# Supplementary material
Source: Elsevier journal article supplement (https://www.sciencedirect.com/science/article/pii/S0210569119302803)
Supplement: mmc1 [file S0210569119302803:mmc1.pdf]

## INFORMACIÓN AL PACIENTE y/ó FAMILIARES SOBRE LA INVESTIGACIÓN:

### Lactato de sodio 0,5 molar y su impacto sobre el medio interno en pacientes críticos

Yo \_\_\_\_\_, en calidad de \_\_\_\_\_ del paciente Sr/Sra \_\_\_\_\_, declaro que he sido informado de que mi \_\_\_\_\_, se encuentra en estado grave con una lesión cerebral que genera aumento de la presión dentro de su cráneo, lo cual compromete su vida siendo su pronóstico grave.

He recibido la siguiente información sobre la investigación:

Se propone disminuir la presión dentro de su cráneo lo cual puede determinar un beneficio en sus posibilidades de sobrevivir y de hacerlo, con menos secuelas y complicaciones que puedan aparecer en la evolución, con el uso de Lactato de Sodio 0,5 Molar, el cual ha demostrado ser eficaz.

El Lactato de sodio es una sustancia líquida, similar al suero que normalmente se administra a cualquier paciente. Este se compone de Sodio y Lactato. Esta última, es una sustancia que resulta un suplemento energético para el cerebro y otros órganos que están en falla, sin tener los efectos perjudiciales del Cloro, presente en el suero salino común.

Se ha comprobado su seguridad en el uso y beneficios sobre la mejoría de la presión intracraneana.

Se propone usar este suero en vez del comúnmente usado, para evitar las complicaciones de este.

Este suero será administrado mientras el paciente se encuentre con presión aumentada dentro del cráneo. Este será administrado en una sola oportunidad y luego se realizarán exámenes de sangre para medición de diferentes parámetros biológicos.

No se realizara ningún cambio en el resto del tratamiento del paciente, por lo que, otros sueros, medicamentos, antibióticos y procedimientos quirúrgicos serán los pautados para estas enfermedades.

La administración de Lactato de Sodio 0,5 Molar se realizará por vía venosa pasándose en forma de bolos. Desde el ingreso a CTI y durante el período de tratamiento se realizarán todos los controles clínicos y de laboratorio así como todas las medidas terapéuticas habituales en los pacientes graves. Ellas son: intubación de la tráquea, conexión al respirador mecánico, vía venosa para administración de sueros y medicamentos, monitoreo invasivo de presión arterial y presión intracraneana, nutrición por sonda, sedantes, analgésicos, antibióticos, antitérmicos y todas las drogas o procedimientos quirúrgicos que sean necesarios.

Queda claramente establecido, que si por cualquier causa, cualquiera sea ella, la misma obliga a retirarlo de la investigación, esto será realizado en forma inmediata

El médico responsable de esta investigación es el Dr. Ignacio Aramendi, médico del Centro de Tratamiento Intensivo, el cual está disponible para evacuar dudas y obtener nueva información con respecto a esta investigación en el teléfono 2480-61-80 y 2487-72-13. Cel 099789694

Por todo lo anterior y en conformidad con ello, doy mi consentimiento para que mi \_\_\_\_\_ participe en la investigación que se me ha explicado.

Asimismo, autorizo que los datos recabados sean utilizados manteniendo la confidencialidad de la identidad de mi \_\_\_\_\_.

Fecha: \_\_\_\_\_ Lugar: \_\_\_\_\_

Firma \_\_\_\_\_ Aclaración \_\_\_\_\_

Testigo: \_\_\_\_\_ Firma \_\_\_\_\_ Aclaración \_\_\_\_\_

Médico \_\_\_\_\_ Firma \_\_\_\_\_ Aclaración \_\_\_\_\_

## INFORMACIÓN AL PACIENTE y/ó FAMILIARES SOBRE LA INVESTIGACIÓN:

### Lactato de sodio 0,5 molar y su impacto sobre el medio interno en pacientes críticos

Yo \_\_\_\_\_, en calidad de \_\_\_\_\_ del paciente Sr/Sra \_\_\_\_\_, declaro que he sido informado de que mi \_\_\_\_\_, se encuentra en estado grave y que presenta una situación de shock en la cual su sistema cardiovascular no responde en forma adecuada a las demandas de su organismo. Para intentar mejorar esta situación se le deben administrar sueros.

He recibido la siguiente información sobre la investigación:

Se propone mejorar la presión arterial y su función cardiovascular con el uso de Lactato de Sodio 0,5 Molar, el cual ha demostrado ser eficaz.

El Lactato de sodio es una sustancia líquida, similar al suero que normalmente se administra a cualquier paciente. Este se compone de Sodio y Lactato. Esta última, es una sustancia que resulta un suplemento energético para diferentes tejidos y otros órganos que están en falla, sin tener los efectos perjudiciales del Cloro, presente en el suero salino común.

Se ha comprobado su seguridad y beneficio en diferentes grupos de pacientes en una situación similar a esta.

Se propone usar este suero en vez del comúnmente usado, para evitar las complicaciones de este. Este será administrado en una sola oportunidad y luego se realizarán exámenes de sangre para medición de diferentes parámetros biológicos.

No se realizará ningún cambio en el resto del tratamiento del paciente, por lo que, otros sueros, medicamentos, antibióticos y procedimientos quirúrgicos serán los pautados para estas enfermedades.

La administración de Lactato de Sodio 0,5 Molar se realizará por vía venosa pasándose en forma de bolos en una sola oportunidad. Desde el ingreso a CTI y durante el período de tratamiento se realizarán todos los controles clínicos y de laboratorio así como todas las medidas terapéuticas habituales en los pacientes graves. Ellas son: intubación de la tráquea, conexión al respirador mecánico, vía venosa para administración de sueros y medicamentos, monitoreo invasivo de presión arterial y presión intracraneana, nutrición por sonda, sedantes, analgésicos, antibióticos, antitérmicos y todas las drogas o procedimientos quirúrgicos que sean necesarios.

Queda claramente establecido, que si por cualquier causa, cualquiera sea ella, la misma obliga a retirarlo de la investigación, esto será realizado en forma inmediata

El médico responsable de esta investigación es el Dr. Ignacio Aramendi, médico del Centro de Tratamiento Intensivo, el cual está disponible para evacuar dudas y obtener nueva información con respecto a esta investigación en el teléfono 2480-61-80 y 2487-72-13. Cel 099789694

Por todo lo anterior y en conformidad con ello, doy mi consentimiento para que mi \_\_\_\_\_ participe en la investigación que se me ha explicado.

Asimismo, autorizo que los datos recabados sean utilizados manteniendo la confidencialidad de la identidad de mi \_\_\_\_\_.

Fecha: \_\_\_\_\_ Lugar: \_\_\_\_\_

Firma \_\_\_\_\_ Aclaración \_\_\_\_\_

Testigo: \_\_\_\_\_ Firma \_\_\_\_\_ Aclaración \_\_\_\_\_

Médico \_\_\_\_\_ Firma \_\_\_\_\_ Aclaración \_\_\_\_\_
